# Supplementary material
Source: publisher figshare collection journal article supplement (https://acs.figshare.com/ndownloader/files/4120483)
Supplement: Supplementary file 1 [file 4120483]

# Rapid Methods to Estimate Potential Exposure to Semivolatile Organic Compounds in the Indoor Environment

John C. Little<sup>1\*</sup>, Charles J. Weschler<sup>2,3</sup>, William W Nazaroff<sup>4</sup>, Zhe Liu<sup>1</sup>, Elaine A. Cohen Hubal<sup>5</sup>

<sup>1</sup>Department of Civil and Environmental Engineering, Virginia Tech, Blacksburg, Virginia, USA

<sup>2</sup>Environmental and Occupational Health Sciences Institute, UMDNJ-Robert Wood Johnson Medical School & Rutgers University, Piscataway, New Jersey, USA

<sup>3</sup>International Centre for Indoor Environment & Energy, Technical University of Denmark, Lyngby, DK

<sup>4</sup>Department of Civil and Environmental Engineering, University of California, Berkeley, California, USA

<sup>5</sup>National Center for Computational Toxicology, Environmental Protection Agency, Research Triangle Park, North Carolina, USA

## Supporting Information

### Simple Models to Estimate SVOC Concentrations in Indoor Air

*SVOC emission model.* The mechanisms governing emissions of SVOCs from a solid material in which it is present as an additive (for example, DEHP in vinyl flooring or BDE-47 in polyurethane foam) are illustrated in Figure 1 [1]. The variables are defined as follows:  $V$  is the room volume,  $A$  is the surface area of the source,  $Q$  is the ventilation rate, and  $y$  is the bulk gas-phase concentration of the SVOC. The SVOC in the solid material, at a material-phase concentration of  $C_0$ , is assumed to be in equilibrium with the SVOC in the air in immediate contact with the solid material, which has a gas-phase concentration of  $y_0$ . For SVOCs present as additives, the depletion of the source occurs so slowly that  $C_0$  and hence  $y_0$  are usually effectively constant, which simplifies conditions so that the emission rate is given by

$$E = h \times (y_0 - y) \quad \text{S.1}$$

where the product of  $h$ , the convective mass transfer coefficient, and  $(y_0 - y)$ , the concentration driving force, determines the rate at which the SVOC moves through the boundary layer of air into the bulk air in the room. SVOCs have low volatility (by definition), and consequently they partition strongly to surfaces in contact with the air. The resulting mass transfer between the bulk air and all interior surfaces (for example, walls, ceilings, windows, carpets, curtains, airborne particles, dust, clothing, human hair and skin) strongly influences the rate of change of the gas-phase concentration,  $y$ , and this in turn affects the emission rate, as shown in equation S.1. A simple linear and reversible equilibrium relationship is assumed to exist between the exposed interior surface area  $A_s$  and the gas-phase concentration of the SVOC in immediate contact with the surface, or

$$q_s = K_s \times y_s \quad \text{S.2}$$

where  $q_s$  is the sorbed SVOC concentration on the surface,  $K_s$  is the surface/air partition coefficient, and  $y_s$  is the gas-phase SVOC concentration in the air in immediate contact with the surface. As with emission from the source, there is a boundary layer through which the SVOC must transfer to get either to or from the surface, and  $E_s$ , the mass transfer rate, is given by

$$E_s = h_s \times (y - y_s) \quad \text{S.3}$$

where  $h_s$  is the convective mass transfer coefficient associated with the surface.

A linear and instantaneously reversible equilibrium relationship is also assumed to exist between the airborne particles and SVOCs in the air, or

$$q_p = K_p \times y \times TSP \quad \text{S.4}$$

Here,  $q_p$  is the sorbed SVOC particle phase concentration,  $K_p$  is the particle/air partition coefficient, and  $TSP$  is the total suspended particle concentration. Because airborne particles are small, the rate of mass transport to particles can usually be neglected for common indoor-air residence time scales, which are on the order of an hour [2]. For emissions of DEHP from vinyl flooring, major elements of the model have been validated [1, 3] or are in the process of being validated. The model is illustrated here for DEHP in vinyl flooring placed in an idealized room. The model parameters used for the simulation are provided in Table S.1 with predictions shown in Figure S.1.

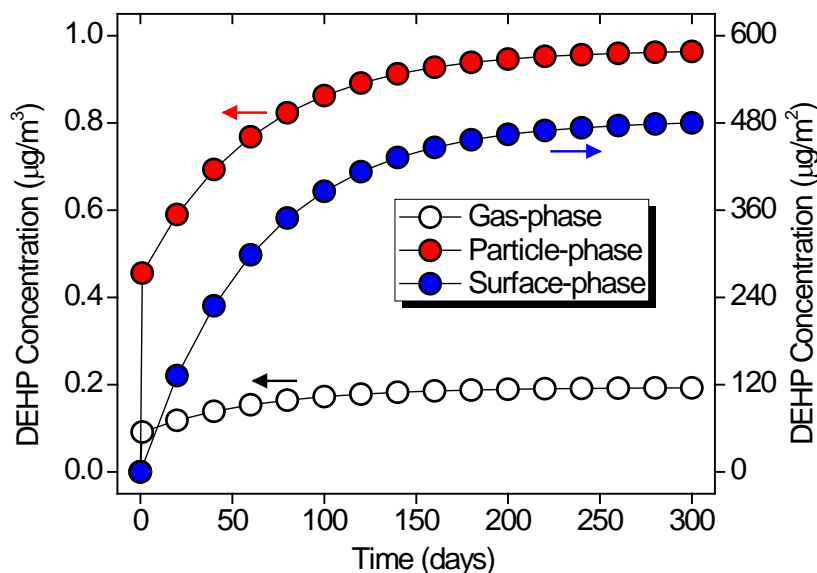

**Figure S.1.** Predicted gas-, particle- and interior surface-phase concentrations of DEHP emitted from vinyl flooring.

According to the simple model, during the first 100 days, approximately 150 mg of DEHP is emitted from the vinyl flooring. Of this, about 12% leaves the room in the gas phase, 57% leaves the room sorbed to particles suspended in the air, and the remaining 31% accumulates on

the interior surfaces. Insight into SVOC persistence can be gleaned by comparing the amounts in the various compartments. On day 300, for example, there would be  $\sim 10 \mu\text{g}$  of DEHP in the air,  $\sim 50 \mu\text{g}$  present on the airborne particles in the air and  $\sim 58,000 \mu\text{g}$  present on the interior surfaces. Table 3 in a previous paper [4] provides similar information for a wide range of compounds. If, in an effort to remove the SVOC from the indoor environment, the windows in the room were opened, the air in the room would be rapidly replaced with fresh air and the  $60 \mu\text{g}$  of airborne DEHP would be ventilated away. However, shortly after the windows were shut again, continued volatilization from the vinyl flooring (at  $\sim 1.2 \mu\text{g}/\text{min}$ ) plus desorption from the interior surfaces (at  $\sim 1.4 \mu\text{g}/\text{min}$  initially) would rapidly restore the airborne levels to the same value as before opening the windows. Because of the large reservoirs associated both with primary sources and with secondary sorbed SVOCs, the system tends towards homeostasis, restoring itself to the former conditions after transient perturbations.

Clearly, the processes taken into account in Figure 1 constitute a highly idealized representation of reality. For example, all interior surface interactions are considered to be on “hard” surfaces with no diffusion of the DEHP into the many soft or porous materials that are commonly found in indoor environments. In addition, a large variety of interior surfaces are lumped into a single surface represented by a “typical” DEHP partition coefficient of 2,500 m [5]. Although this idealization may seem extreme, it has been suggested that indoor environments age in a way that leads to thin organic films with fairly constant properties covering indoor surfaces [2]. The relatively narrow range of partition coefficients estimated for different interior surfaces [5] supports this view. The assumed interior surface area of  $120 \text{ m}^2$  is only about twice the nominal surface area associated with walls and ceilings, and the actual interior surface in many indoor environments may be higher than this value. Finally, it is well known that DEHP sorbs strongly to dust [6, 7]. Such partitioning is not taken into account in this simple model, but is accounted for in the exposure assessment.

## **Rapid Methods to Estimate Exposure**

### *Estimating exposure to SVOCs present in a single product*

*Di-n-butyl phthalate (DnBP).* DnBP is used as a plasticizer in polymers such as PVC products, fiberglass and rubber. With higher volatility than DEHP, DnBP is often used as a gelling aid in combination with other plasticizers [8]. The concentration of DnBP in PVC products tends to be lower than DEHP and may vary greatly. The steady-state gas-phase concentration of DnBP in a chamber with PVC flooring was found to be about  $0.1 \mu\text{g}/\text{m}^3$  [9]. In this case,  $y_0$  can be estimated to be  $0.13 \mu\text{g}/\text{m}^3$  using equation 2. This value is close to those for wallpapers and floorings obtained by Fujie et al. [10] but much lower than the vapor pressure, which corresponds to about  $400 \mu\text{g}/\text{m}^3$ . In contrast, the chamber concentration of DnBP from wall paint is as high as  $100 \mu\text{g}/\text{m}^3$  [11]. Therefore,  $y_0$  for DnBP in PVC products cannot be approximated by the vapor pressure and its dependence on the material-phase concentration is unknown.

In the current illustrative example, PVC flooring with DnBP as plasticizer is the only emission source of DnBP in a room, with the parameters listed in Table S.2. Assuming a steady-state gas-phase concentration of DnBP of about  $0.6 \mu\text{g}/\text{m}^3$ , which falls within the typical indoor

concentration range [12],  $y_0$  is back-calculated to be  $1 \mu\text{g}/\text{m}^3$  based on equation 2. Exposure is then estimated as shown in Tables 2 and 3.

*2,2',4,4'-tetrabromodiphenyl ether (BDE-47)*. BDE-47 is one of the most prevalent of the polybrominated diphenyl ethers (PBDEs), a group of organobromine compounds added to polymer products as flame retardants [13, 14]. BDE-47 is traditionally used in polyurethane foam products. However, in contrast to DEHP and DnBP, which are liquids at room temperature, BDE-47 is a solid at room temperature. Furthermore, the fraction of BDE-47 in the polymer may vary substantially from case to case. For example, the mass fraction of BDE-47 in a polyurethane foam and a carpet vary from  $0.01 \mu\text{g}/\text{g}$  to  $1 \mu\text{g}/\text{g}$  [15] while the percentage of penta-BDE (BDE 47 is one of the major congeners of penta-BDE [13]) in foam can reach 30% by weight [16]. Therefore,  $y_0$  for BDE-47 in a polymer product cannot simply be approximated by the vapor pressure and may vary widely for different products.

In the current example, it is assumed that a sofa made of polyurethane foam is the only source of BDE-47 in a room with parameters listed in Table S.3. Assuming that the steady-state gas-phase concentration of BDE-47 is  $2 \times 10^{-4} \mu\text{g}/\text{m}^3$ , a typical value of indoor BDE-47 concentration [14, 17],  $y_0$  is back-calculated to be  $5 \times 10^{-4} \mu\text{g}/\text{m}^3$  based on equation 2. Exposure estimation is then performed, as shown in Tables 2 and 3. Because the foam is highly porous (porosity is about 97%), air within the foam pores (which is assumed to have a BDE 47 concentration equal to  $y_0$ ) would be expelled into the room when people sit on the sofa, causing release of BDE-47 in addition to surface emissions. A similar effect may occur when temperature increases and air in the pores expands out of the foam. The following rough calculations show that the amount of BDE-47 released through these two mechanisms is insignificant compared to diffusive emissions from the nominal exterior surface.

Assume that people sit on the sofa 5 times each day and that 1 L of air contained in the foam pores is expelled each time. Then the volume of air expelled per day is  $0.005 \text{ m}^3$ , and the amount of BDE 47 released is  $0.005 \cdot y_0 \mu\text{g}/\text{day}$ , or  $3 \times 10^{-11} \mu\text{g}/\text{s}$  assuming an equivalent constant source rate. For comparison, the emission rate from the surface according to equation S.1 is about  $4 \times 10^{-6} \mu\text{g}/\text{s}$ , which is several orders of magnitude higher. Therefore, the release of BDE-47 due to sitting is expected to be small compared to surface emissions. We note that more complicated effects, including the effect of normal and increased bouncing, have been evaluated by Zhang et al. [15].

Regarding the impact of a temperature increase, consider a relatively large diurnal temperature variation of between  $10^\circ\text{C}$  and  $30^\circ\text{C}$ . Air in the sofa expands uniformly when the temperature increases and, according to the ideal gas law, roughly 7% of the air in the sofa would be expelled into the room. Assuming that the total volume of the sofa block is  $3 \text{ m}^3$  and that the air in the block is approximately the same volume and has a gas-phase concentration of  $y_0$ , an equivalent constant source rate is  $3 \times 7\% \times y_0 \mu\text{g}/\text{day}$ , or  $10^{-9} \mu\text{g}/\text{s}$ . Therefore, the release of BDE-47 due to the temperature variation effect is also small compared to surface emissions.

The approach used to estimate steady-state concentration neglecting these two effects appears reasonable, although we caution that knowledge of emissions from foams remains rudimentary. For example, the friability of the foam, the influence of dust within the foam that can sorb BDE-

47 and then be expelled from the foam, and the effect of a fabric cover has not been considered in our analysis.

**Table S.1.** Parameters used to estimate DEHP concentrations in indoor environment.

| Parameter                                                                                                                                               | Value                | Units                    | Source/Reference                     |
|---------------------------------------------------------------------------------------------------------------------------------------------------------|----------------------|--------------------------|--------------------------------------|
| Room volume ( $V$ )                                                                                                                                     | 50                   | $\text{m}^3$             | -                                    |
| Ventilation rate ( $Q$ )                                                                                                                                | 50                   | $\text{m}^3/\text{h}$    | -                                    |
| Emission surface area ( $A$ )                                                                                                                           | 20                   | $\text{m}^2$             | -                                    |
| Interior surface area ( $A_s$ )                                                                                                                         | 120                  | $\text{m}^2$             | -                                    |
| Total suspended particle concentration ( $TSP$ )                                                                                                        | 20                   | $\mu\text{g}/\text{m}^3$ | [7]                                  |
| Gas-phase concentration in contact with the emission surface ( $y_0$ )                                                                                  | 1                    | $\mu\text{g}/\text{m}^3$ | [1, 3]                               |
| Convective mass-transfer coefficient over emission surface ( $h$ )                                                                                      | 3.6                  | $\text{m}/\text{h}$      | [18, 19]                             |
| Convective mass-transfer coefficient over interior surface ( $h_s$ )                                                                                    | 3.6                  | $\text{m}/\text{h}$      | [18, 19]                             |
| Interior surface/air partition coefficient ( $K_s$ )                                                                                                    | 2500                 | $\text{m}$               | [5]                                  |
| Vapor pressure ( $VP$ )                                                                                                                                 | $1.9 \times 10^{-5}$ | $\text{Pa}$              | [5]                                  |
| Airborne particle/air partition coefficient ( $K_p$ )                                                                                                   | 3.2                  | $\text{m}^3/\mu\text{g}$ | Equation in Table 1                  |
| Dust/air partition coefficient ( $K_{dust}$ )                                                                                                           | 790                  | $\text{m}^3/\text{mg}$   | Equation in Table 1                  |
| Octanol/water partition coefficient ( $\log K_{ow}$ ) <sup>a</sup>                                                                                      | 7.4                  |                          | SPARC online calculator v4.5 (32 °C) |
| Octanol/air partition coefficient ( $\log K_{oa}$ ) <sup>a</sup>                                                                                        | 12.9                 |                          | SPARC online calculator v4.5 (25 °C) |
| Water/air partition coefficient ( $\log K_{wa}$ ) <sup>a</sup>                                                                                          | 5.1                  |                          | SPARC online calculator v4.5 (32 °C) |
| Coefficient for transport through boundary layer of air adjacent to skin ( $v_d$ )                                                                      | 0.167                | $\text{cm}/\text{s}$     | [2]                                  |
| Permeability through stratum corneum of an SVOC when its concentration is measured in water in contact with skin ( $k_{p\_cw}$ )                        | 0.00012              | $\text{cm}/\text{s}$     | Equation in Table 1                  |
| Ratio of stratum corneum permeability to viable epidermis permeability ( $B$ )                                                                          | 3.2                  |                          | Equation in Table 1                  |
| Permeability through stratum corneum/viable epidermis composite of SVOC when its concentration is measured in water in contact with skin ( $k_{p\_w}$ ) | $2.8 \times 10^{-5}$ | $\text{cm}/\text{s}$     | Equation in Table 1                  |
| Permeability from the boundary layer at the skin surface through the stratum corneum/viable epidermis composite to dermal capillaries ( $k_{p\_b}$ )    | 3.5                  | $\text{cm}/\text{s}$     | Equation in Table 1                  |
| Overall permeability from bulk air to dermal capillaries ( $k_{p\_g}$ )                                                                                 | 137                  | $\text{m}/\text{d}$      | Equation in Table 1                  |

<sup>a</sup>  $K_{oa}$  at 25 °C is used to estimate  $K_p$  and  $K_{dust}$  in the room at 25 °C;  $K_{ow}$  and  $K_{wa}$  at 32 °C are used to estimate permeability through skin at 32 °C, as done in Table S.2, Table S.3, and Table S.4.

**Table S.2.** Parameters used to estimate DnBP concentrations in indoor environment.

| Parameter                                                                                                                                              | Value                 | Units                    | Source/Reference                                   |
|--------------------------------------------------------------------------------------------------------------------------------------------------------|-----------------------|--------------------------|----------------------------------------------------|
| Room volume ( $V$ )                                                                                                                                    | 50                    | $\text{m}^3$             | -                                                  |
| Ventilation rate ( $Q$ )                                                                                                                               | 50                    | $\text{m}^3/\text{h}$    | -                                                  |
| Emission surface area ( $A$ )                                                                                                                          | 20                    | $\text{m}^2$             | -                                                  |
| Total suspended particle concentration ( $TSP$ )                                                                                                       | 20                    | $\mu\text{g}/\text{m}^3$ | [7]                                                |
| Gas-phase concentration in contact with the emission surface ( $y_0$ )                                                                                 | 1                     | $\mu\text{g}/\text{m}^3$ | Back calculated from typical indoor concentrations |
| Convective mass-transfer coefficient over emission surface ( $h$ )                                                                                     | 3.6                   | $\text{m}/\text{h}$      | [18, 19]                                           |
| Vapor pressure ( $VP$ )                                                                                                                                | $3.6 \times 10^{-3}$  | $\text{Pa}$              | [20]                                               |
| Airborne particle/air partition coefficient ( $K_p$ )                                                                                                  | 0.0025                | $\text{m}^3/\mu\text{g}$ | Equation in Table 1                                |
| Dust/air partition coefficient ( $K_{dust}$ )                                                                                                          | 0.63                  | $\text{m}^3/\text{mg}$   | Equation in Table 1                                |
| Octanol/water partition coefficient ( $\log K_{ow}$ )                                                                                                  | 4.6                   |                          | SPARC online calculator v4.5 (32 °C)               |
| Octanol/air partition coefficient ( $\log K_{oa}$ )                                                                                                    | 9.8                   |                          | SPARC online calculator v4.5 (25 °C)               |
| Water/air partition coefficient ( $\log K_{wa}$ )                                                                                                      | 5.0                   |                          | SPARC online calculator v4.5 (32 °C)               |
| Coefficient for transport through boundary layer of air adjacent to skin ( $v_d$ )                                                                     | 0.167                 | $\text{cm}/\text{s}$     | [2]                                                |
| Permeability through stratum corneum of an SVOC when its concentration is measured in water in contact with skin ( $k_{p_{cw}}$ )                      | $7.77 \times 10^{-6}$ | $\text{cm}/\text{s}$     | Equation in Table 1                                |
| Ratio of stratum corneum permeability to viable epidermis permeability ( $B$ )                                                                         | 0.18                  |                          | Equation in Table 1                                |
| Permeability through stratum corneum/viable epidermis composite of SVOC when its concentration is measured in water in contact with skin ( $k_{p_w}$ ) | $6.59 \times 10^{-6}$ | $\text{cm}/\text{s}$     | Equation in Table 1                                |
| Permeability from the boundary layer at the skin surface through the stratum corneum/viable epidermis composite to dermal capillaries ( $k_{p_b}$ )    | 0.66                  | $\text{cm}/\text{s}$     | Equation in Table 1                                |
| Overall permeability from bulk air to dermal capillaries ( $k_{p_g}$ )                                                                                 | 115                   | $\text{m}/\text{d}$      | Equation in Table 1                                |

**Table S.3.** Parameters used to estimate BDE-47 concentrations in indoor environment.

| Parameter                                                                                                                                              | Value                 | Units                    | Source/Reference                                   |
|--------------------------------------------------------------------------------------------------------------------------------------------------------|-----------------------|--------------------------|----------------------------------------------------|
| Room volume ( $V$ )                                                                                                                                    | 50                    | $\text{m}^3$             | -                                                  |
| Ventilation rate ( $Q$ )                                                                                                                               | 50                    | $\text{m}^3/\text{h}$    | -                                                  |
| Emission surface area ( $A$ )                                                                                                                          | 15                    | $\text{m}^2$             | -                                                  |
| Total suspended particle concentration ( $TSP$ )                                                                                                       | 20                    | $\mu\text{g}/\text{m}^3$ | [7]                                                |
| Gas-phase concentration in contact with the emission surface ( $y_0$ )                                                                                 | $5 \times 10^{-4}$    | $\mu\text{g}/\text{m}^3$ | Back calculated from typical indoor concentrations |
| Convective mass-transfer coefficient over emission surface ( $h$ )                                                                                     | 3.6                   | $\text{m}/\text{h}$      | [18, 19]                                           |
| Vapor pressure ( $VP$ )                                                                                                                                | $2.5 \times 10^{-4}$  | Pa                       | [21]                                               |
| Airborne particle/air partition coefficient ( $K_p$ )                                                                                                  | 0.01                  | $\text{m}^3/\mu\text{g}$ | Equation in Table 1                                |
| Dust/air partition coefficient ( $K_{dust}$ )                                                                                                          | 3.16                  | $\text{m}^3/\text{mg}$   | Equation in Table 1                                |
| Octanol/water partition coefficient ( $\log K_{ow}$ )                                                                                                  | 7.0                   |                          | SPARC online calculator v4.5 (32 °C)               |
| Octanol/air partition coefficient ( $\log K_{oa}$ )                                                                                                    | 10.5                  |                          | SPARC online calculator v4.5 (25 °C)               |
| Water/air partition coefficient ( $\log K_{wa}$ )                                                                                                      | 3.1                   |                          | SPARC online calculator v4.5 (32 °C)               |
| Coefficient for transport through boundary layer of air adjacent to skin ( $v_d$ )                                                                     | 0.167                 | $\text{cm}/\text{s}$     | [2]                                                |
| Permeability through stratum corneum of an SVOC when its concentration is measured in water in contact with skin ( $k_{p_{cw}}$ )                      | $1.5 \times 10^{-5}$  | $\text{cm}/\text{s}$     | Equation in Table 1                                |
| Ratio of stratum corneum permeability to viable epidermis permeability ( $B$ )                                                                         | 0.47                  |                          | Equation in Table 1                                |
| Permeability through stratum corneum/viable epidermis composite of SVOC when its concentration is measured in water in contact with skin ( $k_{p_w}$ ) | $1.05 \times 10^{-5}$ | $\text{cm}/\text{s}$     | Equation in Table 1                                |
| Permeability from the boundary layer at the skin surface through the stratum corneum/viable epidermis composite to dermal capillaries ( $k_{p_b}$ )    | 0.01                  | $\text{cm}/\text{s}$     | Equation in Table 1                                |
| Overall permeability from bulk air to dermal capillaries ( $k_{p_g}$ )                                                                                 | 10.5                  | $\text{m}/\text{d}$      | Equation in Table 1                                |



**Table S.4.** Parameters used to estimate chlorpyrifos concentrations in indoor environment.

| Parameter                                                                                                                                              | Value                | Units                    | Source/Reference                                                  |
|--------------------------------------------------------------------------------------------------------------------------------------------------------|----------------------|--------------------------|-------------------------------------------------------------------|
| Room volume ( $V$ )                                                                                                                                    | 290                  | $\text{m}^3$             | Total area $122 \text{ m}^2$ and room height $2.4 \text{ m}$ [22] |
| Ventilation rate ( $Q$ )                                                                                                                               | 439.2                | $\text{m}^3/\text{h}$    | Air exchange rate of $36 \text{ d}^{-1}$ [22]                     |
| Treated area ( $A$ )                                                                                                                                   | 0.75                 | $\text{m}^2$             | [22]                                                              |
| Interior surface area ( $A_s$ )                                                                                                                        | 360                  | $\text{m}^2$             | Assume the plan view of house is about $17 \times 7 \text{ m}$    |
| Total suspended particle concentration ( $TSP$ )                                                                                                       | 21.6                 | $\mu\text{g}/\text{m}^3$ | Sum of $TSP$ in different size ranges [22]                        |
| Gas-phase concentration in contact with the emission surface ( $y_0$ )                                                                                 | 350                  | $\mu\text{g}/\text{m}^3$ | Vapor pressure expressed in unit of concentration                 |
| Convective mass-transfer coefficient over emission surface ( $h$ )                                                                                     | 3.6                  | $\text{m}/\text{h}$      | [18, 19]                                                          |
| Convective mass-transfer coefficient over interior surface ( $h_s$ )                                                                                   | 3.6                  | $\text{m}/\text{h}$      | [18, 19]                                                          |
| Initial applied amount ( $M_0$ )                                                                                                                       | 1.29                 | $\text{g}$               | [22]                                                              |
| Vapor pressure ( $VP$ )                                                                                                                                | 0.0025               | $\text{Pa}$              | [22]                                                              |
| Airborne particle/air partition coefficient ( $K_p$ )                                                                                                  | 0.001                | $\text{m}^3/\mu\text{g}$ | Equation in Table 1                                               |
| Dust/air partition coefficient ( $K_{dust}$ )                                                                                                          | 0.25                 | $\text{m}^3/\text{mg}$   | Equation in Table 1                                               |
| Octanol/water partition coefficient ( $\log K_{ow}$ )                                                                                                  | 6.4                  |                          | SPARC online calculator v4.5 ( $32^\circ\text{C}$ )               |
| Octanol/air partition coefficient ( $\log K_{oa}$ )                                                                                                    | 9.4                  |                          | SPARC online calculator v4.5 ( $25^\circ\text{C}$ )               |
| Water/air partition coefficient ( $\log K_{wa}$ )                                                                                                      | 2.8                  |                          | SPARC online calculator v4.5 ( $32^\circ\text{C}$ )               |
| Coefficient for transport through boundary layer of air adjacent to skin ( $v_d$ )                                                                     | 0.167                | $\text{cm}/\text{s}$     | [2]                                                               |
| Permeability through stratum corneum of an SVOC when its concentration is measured in water in contact with skin ( $k_{p_{cw}}$ )                      | $4.3 \times 10^{-5}$ | $\text{cm}/\text{s}$     | Equation in Table 1                                               |
| Ratio of stratum corneum permeability to viable epidermis permeability ( $B$ )                                                                         | 1.1                  |                          | Equation in Table 1                                               |
| Permeability through stratum corneum/viable epidermis composite of SVOC when its concentration is measured in water in contact with skin ( $k_{p_w}$ ) | $2.0 \times 10^{-5}$ | $\text{cm}/\text{s}$     | Equation in Table 1                                               |
| Permeability from the boundary layer at the skin surface through the stratum corneum/viable epidermis composite to dermal capillaries ( $k_{p_b}$ )    | 0.013                | $\text{cm}/\text{s}$     | Equation in Table 1                                               |
| Overall permeability from bulk air to dermal capillaries ( $k_{p_g}$ )                                                                                 | 10.3                 | $\text{m}/\text{d}$      | Equation in Table 1                                               |

*Estimating exposure to SVOCs present in a range of similar products*

**Table S.5.** DEHP end-product use per person in the European Union.

|                           | <b>End-product use of DEHP<sup>a</sup></b><br>(t/y) | <b>In-service life<sup>b</sup></b><br>(y) | <b>DEHP content<sup>b</sup></b><br>(w/w) | <b>Product mass<sup>c</sup></b><br>(g/person) | <b>Weight per unit area<sup>b</sup></b><br>(kg/m <sup>2</sup> ) | <b>Product area<sup>c</sup></b><br>(m <sup>2</sup> /person) |
|---------------------------|-----------------------------------------------------|-------------------------------------------|------------------------------------------|-----------------------------------------------|-----------------------------------------------------------------|-------------------------------------------------------------|
| <b>Flooring</b>           | 30,200                                              | 20                                        | 0.2                                      | 6040                                          | 2.9                                                             | 2.1                                                         |
| <b>Wall covering</b>      | 10,100                                              | 20                                        | 0.3                                      | 1350                                          | 2                                                               | 0.67                                                        |
| <b>Film and sheet</b>     | 41,200                                              | 10                                        | 0.3                                      | 2750                                          | 0.1                                                             | 27                                                          |
| <b>Wires and cables</b>   | 52,600                                              | 25                                        | 0.225                                    | 11700                                         | 0.7                                                             | 17                                                          |
| <b>Hoses and profiles</b> | 29,600                                              | 10                                        | 0.3                                      | 1970                                          | 3.3                                                             | 0.6                                                         |
| <b>Coated fabric</b>      | 31,800                                              | 10                                        | 0.3                                      | 2120                                          | 0.6                                                             | 3.5                                                         |
| <b>Moulded products</b>   | 5,000                                               | 5                                         | 0.3                                      | 170                                           | 10                                                              | 0.02                                                        |
| <b>Other</b>              | 20,100                                              | 10                                        | 0.3                                      | 1340                                          | 2                                                               | 0.67                                                        |

<sup>a</sup> Data are obtained from Table 2-5 [23].

<sup>b</sup> Data are obtained from Table 2-10 [23].

<sup>c</sup> Data are calculated as the end-product use rate multiplied by the in-service life, divided by the DEHP content, and divided by the EU population of 500 million persons.

**Table S.6.** Parameters for estimating exposure to DEHP via indoor air in a typical household.

| <b>Parameter</b>           | <b>Value</b> | <b>Source</b>                                                                                                                                    |
|----------------------------|--------------|--------------------------------------------------------------------------------------------------------------------------------------------------|
| Household size (persons)   | 2.6          | U.S. Census Bureau, Census 2000<br>( <a href="http://factfinder.census.gov/servlet/SAFFacts">http://factfinder.census.gov/servlet/SAFFacts</a> ) |
| $V$ (m <sup>3</sup> )      | 400          | [24]                                                                                                                                             |
| $Q$ (m <sup>3</sup> /h)    | 180          | [24]                                                                                                                                             |
| $A$ (m <sup>2</sup> )      | 134          | Function of household size and product area per person                                                                                           |
| $TSP$ (µg/m <sup>3</sup> ) | 20           | [25]                                                                                                                                             |
| $y_0$ (µg/m <sup>3</sup> ) | 1            | [25]                                                                                                                                             |
| $h$ (m/h)                  | 1.8          | [25] <sup>a</sup>                                                                                                                                |

<sup>a</sup> Considering that a large portion of the emission area may be located in stagnant regions, an average  $h$  of half the mean value for flat indoor surfaces is used.

*Estimating exposure to SVOCs proposed as substitutes in specific products*

If exposure to a high-risk SVOC is roughly known, then the unknown exposure for a substitute SVOC can be estimated. If  $y_0$  is not known, we assume that  $y_0$  scales linearly with  $VP$ . We can then evaluate the ratio of the “unknown” exposure to the “known” exposure for each of the three indoor exposure pathways. We can do this for either class of SVOCs (those that are present as additives and those that are directly sprayed or applied to interior surfaces).

In the case of SVOCs present as additives, we can simplify the calculation if both SVOCs of interest have a  $\log(K_{oa})$  that is less than 9.8, which implies that  $Q^* \sim Q$  because sorption to particles is relatively small. To illustrate, we have:

$$Q^* = (1 + K_p \times TSP) \times Q = \{1 + (f_{om\_part} \times K_{oa} \times TSP)/\rho_{pa}\} \times Q$$

For typical indoor conditions:

$$\rho_{part} \sim 1 \times 10^{12} \mu\text{g}/\text{m}^3$$

$$f_{om\_part} \sim 0.4$$

$$TSP \sim 20 \mu\text{g}/\text{m}^3$$

Substituting, we obtain:

$$(f_{om\_part} \times TSP)/\rho_{part} \sim 8 \times 10^{-12} \sim 10^{-11}$$

$$Q^* = (1 + 10^{-11} K_{oa}) \times Q \text{ and therefore } Q^* \sim Q \text{ if } \log(K_{oa}) \text{ is less than } 9.8.$$

*Inhalation.* For gas-phase inhalation, the ratio of unknown exposure to known exposure is given by the ratio of  $(y_{unknown}/y_{known})$ . Because  $Q^* \sim Q$ , we have  $y = h \times y_0 \times A/(h \times A + Q)$  and hence:

$$\begin{aligned} y_{unknown}/y_{known} &\sim \{h \times y_{0\_unknown} \times A/(h \times A + Q)\} / \{h \times y_{0\_known} \times A/(h \times A + Q)\} \\ &= y_{0\_unknown}/y_{0\_known} = (VP_{unknown}/VP_{known}) \end{aligned}$$

For inhalation of airborne particles, the ratio of unknown exposure to known exposure is:

$$\begin{aligned} y_{unknown} \times K_{p\_unknown} / y_{known} \times K_{p\_known} \\ &= \{VP_{unknown} \times (h \times A + Q) \times K_{oa\_unknown}\} / \{VP_{known} \times (h \times A + Q) \times K_{oa\_known}\} \\ &= (VP_{unknown} K_{oa\_unknown}) / (VP_{known} K_{oa\_known}) \end{aligned}$$

*Ingestion of dust.* For ingestion of dust, the ratio of unknown exposure to known exposure is:

$$\begin{aligned} y_{unknown} K_{dust\_unknown} / y_{known} K_{dust\_known} &= y_{unknown} K_{oa\_unknown} / y_{known} K_{oa\_known} \\ &= (VP_{unknown} K_{oa\_unknown}) / (VP_{known} K_{oa\_known}) \end{aligned}$$

*Dermal absorption.* For dermal absorption, the ratio of unknown exposure to known exposure is:

$$\begin{aligned} y_{unknown} k_{p\_g\_unknown} / y_{known} k_{p\_g\_known} \\ &= (VP_{unknown} k_{p\_g\_unknown}) / (VP_{known} k_{p\_g\_known}) \end{aligned}$$

If either of the SVOCs of interest has a log ( $K_{oa}$ ) that is greater than 9.8, then we cannot simplify the calculation.

In the general case of SVOCs present as additives, the ratio of unknown exposure to known exposure can be calculated as follows.

*Inhalation.* For gas-phase inhalation, the ratio of unknown exposure to known exposure is:

$$\begin{aligned} y_{unknown}/y_{known} &= \{y_{0\_unknown}/(h \times A + Q^*_{unknown})\}/\{y_{0\_known}/(h \times A + Q^*_{known})\} \\ &= \{y_{0\_unknown} \times (h \times A + Q^*_{known})\}/\{y_{0\_known} \times (h \times A + Q^*_{unknown})\} \\ &= \{VP_{unknown} \times (h \times A + Q^*_{known})\}/\{VP_{known} \times (h \times A + Q^*_{unknown})\} \end{aligned}$$

For the inhalation of airborne particles, the ratio of unknown exposure to known exposure is:

$$\begin{aligned} y_{unknown} \times K_{p\_unknown}/y_{known} \times K_{p\_known} \\ = \{VP_{unknown} \times (h \times A + Q^*_{known}) \times K_{oa\_unknown}\}/\{VP_{known} \times (h \times A + Q^*_{unknown}) \times K_{oa\_known}\} \end{aligned}$$

*Ingestion of dust.* For ingestion of dust, the ratio of unknown exposure to known exposure is:

$$\begin{aligned} y_{unknown} K_{dust\_unknown}/y_{known} K_{dust\_known} \\ = \{VP_{unknown} \times (h \times A + Q^*_{known}) \times K_{oa\_unknown}\}/\{VP_{known} \times (h \times A + Q^*_{unknown}) \times K_{oa\_known}\} \end{aligned}$$

*Dermal absorption.* For dermal absorption, the ratio of unknown exposure to known exposure is:

$$\begin{aligned} y_{unknown} k_{p\_g\_unknown}/y_{known} k_{p\_g\_known} \\ = \{VP_{unknown} \times (h \times A + Q^*_{known}) \times k_{p\_g\_unknown}\}/\{VP_{known} \times (h \times A + Q^*_{unknown}) \times k_{p\_g\_known}\} \end{aligned}$$

In the general case of SVOCs that are sprayed or applied to interior surfaces, similar ratios can be calculated.

## References

1. Xu, Y.; Little, J. C., Predicting emissions of SVOCs from polymeric materials and their interaction with airborne particles. *Environmental Science & Technology* **2006**, *40*, (2), 456-461.
2. Weschler, C. J.; Nazaroff, W. W., Semivolatile organic compounds in indoor environments. *Atmospheric Environment* **2008**, *42*, (40), 9018-9040.
3. Clausen, P. A.; Liu, Z.; Xu, Y.; Kofoed-Sørensen, V.; Little, J. C., Influence of air flow rate on emission of DEHP from vinyl flooring in the emission cell FLEC: Measurements and CFD simulation. *Atmospheric Environment* **2010**, *44*, (23), 2760-2766.
4. Weschler, C. J., Indoor/outdoor connections exemplified by processes that depend on an organic compound's saturation vapor pressure. *Atmospheric Environment* **2003**, *37*, (39-40), 5455-5465.
5. Xu, Y.; Cohen Hubal, E. A.; Clausen, P. A.; Little, J. C., Predicting residential exposure to phthalate plasticizer emitted from vinyl flooring: a mechanistic analysis. *Environmental Science & Technology* **2009**, *43*, (7), 2374-2380.
6. Weschler, C. J.; Nazaroff, W. W., SVOC partitioning between the gas phase and settled dust indoors. *Atmospheric Environment* **2010**, *44*, (30), 3609-3620.
7. Weschler, C. J.; Salthammer, T.; Fromme, H., Partitioning of phthalates among the gas phase, airborne particles and settled dust in indoor environments. *Atmospheric Environment* **2008**, *42*, (7), 1449-1460.
8. ECHA *Data on manufacture, import, export, uses and releases of dibutyl phthalate (DBP) as well as information on potential alternatives to its use (revised 29 January 2009)*; European Chemicals Agency: 2009.
9. Afshari, A.; Gunnarsen, L.; Clausen, P. A.; Hansen, V., Emission of phthalates from PVC and other materials. *Indoor Air* **2004**, *14*, (2), 120-128.
10. Fujii, M.; Shinohara, N.; Lim, A.; Otake, T.; Kumagai, K.; Yanagisawa, Y., A study on emission of phthalate esters from plastic materials using a passive flux sampler. *Atmospheric Environment* **2003**, *37*, (39-40), 5459-5504.
11. Schripp, T.; Fauck, C.; Salthammer, T., Chamber studies on mass-transfer of di(2-ethylhexyl)phthalate (DEHP) and di-n-butylphthalate (DnBP) from emission sources into house dust. *Atmospheric Environment* **2010**, *44*, (24), 2840-2845.
12. Wormuth, M.; Scheringer, M.; Vollenweider, M.; Hungerbühler, K., What are the sources of exposure to eight frequently used phthalic acid esters in Europeans? *Risk Analysis* **2006**, *26*, (3), 803-824.
13. Rudel, R. A.; Perovich, L. J., Endocrine disrupting chemicals in indoor and outdoor air. *Atmospheric Environment* **2009**, *43*, (1), 170-181.
14. Hites, R. A., Polybrominated diphenyl ethers in the environment and in people: A meta-analysis of concentrations. *Environmental Science & Technology* **2004**, *38*, (4), 945-956.
15. Zhang, X.; Diamond, M. L.; Ibarra, C.; Harrad, S., Multimedia modeling of polybrominated diphenyl ether emissions and fate indoors. *Environmental Science & Technology* **2009**, *43*, (8), 2845-2850.
16. Hale, R. C.; La Guardia, M. J.; Harvey, E.; Mainor, T. M., Potential role of fire retardant-treated polyurethane foam as a source of brominated diphenyl ethers to the US environment. *Chemosphere* **2002**, *46*, (5), 729-735.

17. Allen, J. G.; McClean, M. D.; Stapleton, H. M.; Nelson, J. W.; Webster, T. F., Personal exposure to polybrominated diphenyl ethers (PBDEs) in residential indoor air. *Environmental Science & Technology* **2007**, *41*, (13), 4574-4579.
18. Huang, J. M.; Chen, Q.; Ribot, B.; Rivoalen, H., Modelling contaminant exposure in a single-family house. *indoor and Built Environment* **2004**, *13*, (1), 5-19.
19. Lin, B.; Tan, G.; Wang, P.; Song, L.; Zhu, Y.; Zhai, G., Study on the thermal performance of the Chinese traditional vernacular dwellings in Summer. *Energy and Buildings* **2004**, *36*, (1), 73-79.
20. Staples, C. A.; Peterson, D. R.; Parkerton, T. F.; Adams, W. J., The environmental fate of phthalate esters: A literature review. *Chemosphere* **1997**, *35*, (4), 667-749.
21. Wong, A.; Lei, Y. D.; Alaei, M.; Wania, F., Vapor pressures of the polybrominated diphenyl ethers. *Journal of Chemical and Engineering Data* **2001**, *46*, (2), 239-242.
22. Bennett, D. H.; Furtaw, E. J., Fugacity-based indoor residential pesticide fate model. *Environmental Science and Technology* **2004**, *38*, (7), 2142-2152.
23. ECHA *Data on manufacture, import, export, uses and releases of bis(2-ethylhexyl)phthalate (DEHP) as well as information on potential alternatives to its use (revised 29 January 2009)*; European Chemicals Agency: 2009.
24. EPA, Exposure Factors Handbook (External Review Draft) 2009 Update. In Agency, U. S. E. P., Ed. Washington, DC, 2009.
25. Xu, Y.; Cohen Hubal, E. A.; Little, J. C., Predicting residential exposure to phthalate plasticizer emitted from vinyl flooring: sensitivity, uncertainty, and implications for biomonitoring. *Environmental Health Perspectives* **2010**, *118*, (2), 253-258.
